# Supplementary material for: Intranasal Borna Disease Virus (BoDV-1) Infection: Insights into Initial Steps and Potential Contagiosity
Source: MDPI journal article supplement (doi:10.3390/ijms20061318), 2019-03-15
Supplement: s1 [file s1]

A

| cell type / structure       | <i>p</i> values |             |         |
|-----------------------------|-----------------|-------------|---------|
|                             | BoDV-1-N        | genomic RNA | mRNA    |
| adult neurons               | <0.0001         | <0.0001     | <0.0001 |
| juvenile neurons            | <0.0001         | <0.0001     | <0.0001 |
| sustentacular cells         | 0.0001          | -           | -       |
| globose basal cells         | 0.0002          | -           | -       |
| horizontal basal cells      | 0.0016          | -           | -       |
| nerve fibers                | <0.0001         | 0.0031      | 0.0014  |
| olfactory ensheathing cells | <0.0001         | <0.0001     | 0.0016  |

B

| cell type / structure       | <i>r<sub>s</sub></i> |             |        |
|-----------------------------|----------------------|-------------|--------|
|                             | BoDV-1-N             | genomic RNA | mRNA   |
| adult neurons               | 0.7563               | 0.7657      | 0.7954 |
| juvenile neurons            | 0.6813               | 0.7257      | 0.6817 |
| sustentacular cells         | 0.5762               | -           | -      |
| globose basal cells         | 0.6007               | -           | -      |
| horizontal basal cells      | 0.5157               | -           | -      |
| nerve fibers                | 0.6866               | 0.5642      | 0.5171 |
| olfactory ensheathing cells | 0.6866               | 0.705       | 0.5146 |
