# Supplementary material for: Intranasal Borna Disease Virus (BoDV-1) Infection: Insights into Initial Steps and Potential Contagiosity
Source: MDPI journal article supplement (doi:10.3390/ijms20061318), 2019-03-15
Supplement: s1 [file s1]

| Primer / TaqMan® probe<br>Sequence (5' - 3')                 | Concentration<br>(nM) | GenBank®<br>Accession-number<br>(length / position) |
|--------------------------------------------------------------|-----------------------|-----------------------------------------------------|
| *BoDV-1-N sense (p332)<br>CGG GTA TAG GGC ATG AGA AGG<br>ATA | 200                   | AF158629<br>(96 bp / 134-229)                       |
| *BoDV-1-N antisense (p333)<br>CAA GGC TGG GCG TTA CTG TAT G  | 300                   |                                                     |
| BoDV-1-N probe<br>CGC CGT GAC TGG TCT AAC AAT<br>GCC ACT     | 200                   |                                                     |
| GAPDH sense (p338)<br>GGT CTA CAT GTT CCA GTA TGA<br>CTC T   | 100                   | NM017008<br>(82 bp / 972-1053)                      |
| *GAPDH antisense (p339)<br>GTT GAT GAC CAG CTT CCC ATT CT    | 100                   |                                                     |
| GAPDH probe<br>CGG CAA GTT CAA CGG CAC AGT<br>CAA GGC        | 100                   |                                                     |
