# Supplementary material for: Intranasal Borna Disease Virus (BoDV-1) Infection: Insights into Initial Steps and Potential Contagiosity
Source: MDPI journal article supplement (doi:10.3390/ijms20061318), 2019-03-15
Supplement: s1 [file s1]

A

## Immunohistochemistry BoDV-1-N

|                             |       | Time post infection | 3 hpi | 18 hpi | 1 dpi | 2 dpi | 4 dpi | 7 dpi | 14 dpi | 21 dpi |
|-----------------------------|-------|---------------------|-------|--------|-------|-------|-------|-------|--------|--------|
| Adult neurons               | Score | 0                   | 5     | 5      | 5     | 5     | 3     | 3     | 0      | 0      |
|                             |       | 1                   | 0     | 0      | 0     | 0     | 2     | 2     | 0      | 0      |
|                             |       | 2                   | 0     | 0      | 0     | 0     | 0     | 0     | 2      | 0      |
|                             |       | 3                   | 0     | 0      | 0     | 0     | 0     | 0     | 3      | 2      |
|                             |       | Arithmetic mean     | 0     | 0      | 0     | 0     | 0.4   | 0.4   | 2.6    | 3      |
| Juvenile neurons            | Score | 0                   | 5     | 5      | 5     | 5     | 4     | 5     | 0      | 0      |
|                             |       | 1                   | 0     | 0      | 0     | 0     | 1     | 0     | 2      | 0      |
|                             |       | 2                   | 0     | 0      | 0     | 0     | 0     | 0     | 1      | 1      |
|                             |       | 3                   | 0     | 0      | 0     | 0     | 0     | 0     | 2      | 1      |
|                             |       | Arithmetic mean     | 0     | 0      | 0     | 0     | 0.2   | 0     | 2      | 2.5    |
| Sustentacular cells         | Score | 0                   | 5     | 5      | 5     | 5     | 5     | 5     | 2      | 0      |
|                             |       | 1                   | 0     | 0      | 0     | 0     | 0     | 0     | 1      | 0      |
|                             |       | 2                   | 0     | 0      | 0     | 0     | 0     | 0     | 2      | 1      |
|                             |       | 3                   | 0     | 0      | 0     | 0     | 0     | 0     | 0      | 1      |
|                             |       | Arithmetic mean     | 0     | 0      | 0     | 0     | 0     | 0     | 1      | 2.5    |
| Globose basal cells         | Score | 0                   | 5     | 5      | 5     | 5     | 5     | 4     | 2      | 0      |
|                             |       | 1                   | 0     | 0      | 0     | 0     | 0     | 1     | 1      | 0      |
|                             |       | 2                   | 0     | 0      | 0     | 0     | 0     | 0     | 2      | 1      |
|                             |       | 3                   | 0     | 0      | 0     | 0     | 0     | 0     | 0      | 1      |
|                             |       | Arithmetic mean     | 0     | 0      | 0     | 0     | 0     | 0.2   | 1      | 2.5    |
| Horizontal basal cells      | Score | 0                   | 5     | 5      | 5     | 5     | 5     | 5     | 3      | 0      |
|                             |       | 1                   | 0     | 0      | 0     | 0     | 0     | 0     | 0      | 1      |
|                             |       | 2                   | 0     | 0      | 0     | 0     | 0     | 0     | 2      | 1      |
|                             |       | 3                   | 0     | 0      | 0     | 0     | 0     | 0     | 0      | 0      |
|                             |       | Arithmetic mean     | 0     | 0      | 0     | 0     | 0     | 0     | 0.8    | 1.5    |
| Nerve fibers                | Score | 0                   | 5     | 5      | 5     | 5     | 5     | 5     | 0      | 0      |
|                             |       | 1                   | 0     | 0      | 0     | 0     | 0     | 0     | 1      | 0      |
|                             |       | 2                   | 0     | 0      | 0     | 0     | 0     | 0     | 4      | 0      |
|                             |       | 3                   | 0     | 0      | 0     | 0     | 0     | 0     | 0      | 2      |
|                             |       | Arithmetic mean     | 0     | 0      | 0     | 0     | 0     | 0     | 1.8    | 3      |
| Olfactory ensheathing cells | Score | 0                   | 5     | 5      | 5     | 5     | 5     | 5     | 0      | 0      |
|                             |       | 1                   | 0     | 0      | 0     | 0     | 0     | 0     | 1      | 0      |
|                             |       | 2                   | 0     | 0      | 0     | 0     | 0     | 0     | 4      | 0      |
|                             |       | 3                   | 0     | 0      | 0     | 0     | 0     | 0     | 0      | 2      |
|                             |       | Arithmetic mean     | 0     | 0      | 0     | 0     | 0     | 0     | 1.8    | 3      |

B

*In situ* hybridization viral genomic RNA (gRNA)

|                             |       | Time post infection | 3 hpi | 18 hpi | 1 dpi | 2 dpi | 4 dpi | 7 dpi | 14 dpi | 21 dpi |
|-----------------------------|-------|---------------------|-------|--------|-------|-------|-------|-------|--------|--------|
| Adult neurons               | Score | 0                   | 5     | 5      | 5     | 5     | 5     | 2     | 0      | 0      |
|                             |       | 1                   | 0     | 0      | 0     | 0     | 0     | 2     | 0      | 0      |
|                             |       | 2                   | 0     | 0      | 0     | 0     | 0     | 1     | 5      | 2      |
|                             |       | 3                   | 0     | 0      | 0     | 0     | 0     | 0     | 0      | 0      |
|                             |       | Arithmetic mean     | 0     | 0      | 0     | 0     | 0     | 0.8   | 2      | 2      |
| Juvenile neurons            | Score | 0                   | 5     | 5      | 5     | 5     | 5     | 3     | 0      | 0      |
|                             |       | 1                   | 0     | 0      | 0     | 0     | 0     | 1     | 5      | 1      |
|                             |       | 2                   | 0     | 0      | 0     | 0     | 0     | 1     | 0      | 1      |
|                             |       | 3                   | 0     | 0      | 0     | 0     | 0     | 0     | 0      | 0      |
|                             |       | Arithmetic mean     | 0     | 0      | 0     | 0     | 0     | 0.6   | 1      | 1.5    |
| Sustentacular cells         | Score | 0                   | 5     | 5      | 5     | 5     | 5     | 5     | 5      | 2      |
|                             |       | 1                   | 0     | 0      | 0     | 0     | 0     | 0     | 0      | 0      |
|                             |       | 2                   | 0     | 0      | 0     | 0     | 0     | 0     | 0      | 0      |
|                             |       | 3                   | 0     | 0      | 0     | 0     | 0     | 0     | 0      | 0      |
|                             |       | Arithmetic mean     | 0     | 0      | 0     | 0     | 0     | 0     | 0      | 0      |
| Globose basal cells         | Score | 0                   | 5     | 5      | 5     | 5     | 5     | 5     | 5      | 2      |
|                             |       | 1                   | 0     | 0      | 0     | 0     | 0     | 0     | 0      | 0      |
|                             |       | 2                   | 0     | 0      | 0     | 0     | 0     | 0     | 0      | 0      |
|                             |       | 3                   | 0     | 0      | 0     | 0     | 0     | 0     | 0      | 0      |
|                             |       | Arithmetic mean     | 0     | 0      | 0     | 0     | 0     | 0     | 0      | 0      |
| Horizontal basal cells      | Score | 0                   | 5     | 5      | 5     | 5     | 5     | 5     | 5      | 2      |
|                             |       | 1                   | 0     | 0      | 0     | 0     | 0     | 0     | 0      | 0      |
|                             |       | 2                   | 0     | 0      | 0     | 0     | 0     | 0     | 0      | 0      |
|                             |       | 3                   | 0     | 0      | 0     | 0     | 0     | 0     | 0      | 0      |
|                             |       | Arithmetic mean     | 0     | 0      | 0     | 0     | 0     | 0     | 0      | 0      |
| Nerve fibers                | Score | 0                   | 5     | 5      | 5     | 5     | 5     | 3     | 3      | 0      |
|                             |       | 1                   | 0     | 0      | 0     | 0     | 0     | 2     | 2      | 1      |
|                             |       | 2                   | 0     | 0      | 0     | 0     | 0     | 0     | 0      | 1      |
|                             |       | 3                   | 0     | 0      | 0     | 0     | 0     | 0     | 0      | 0      |
|                             |       | Arithmetic mean     | 0     | 0      | 0     | 0     | 0     | 0.4   | 0.4    | 1.5    |
| Olfactory ensheathing cells | Score | 0                   | 5     | 5      | 5     | 5     | 5     | 4     | 0      | 0      |
|                             |       | 1                   | 0     | 0      | 0     | 0     | 0     | 1     | 2      | 1      |
|                             |       | 2                   | 0     | 0      | 0     | 0     | 0     | 0     | 3      | 1      |
|                             |       | 3                   | 0     | 0      | 0     | 0     | 0     | 0     | 0      | 0      |
|                             |       | Arithmetic mean     | 0     | 0      | 0     | 0     | 0     | 0.2   | 1.6    | 1.5    |

C

*In situ* hybridization messenger RNA (mRNA)

|                             |       | Time post infection | 3 hpi | 18 hpi | 1 dpi | 2 dpi | 4 dpi | 7 dpi | 14 dpi | 21 dpi |
|-----------------------------|-------|---------------------|-------|--------|-------|-------|-------|-------|--------|--------|
| Adult neurons               | Score | 0                   | 5     | 5      | 5     | 5     | 3     | 1     | 0      | 0      |
|                             |       | 1                   | 0     | 0      | 0     | 0     | 0     | 3     | 1      | 0      |
|                             |       | 2                   | 0     | 0      | 0     | 0     | 2     | 1     | 3      | 1      |
|                             |       | 3                   | 0     | 0      | 0     | 0     | 0     | 0     | 1      | 1      |
|                             |       | Arithmetic mean     | 0     | 0      | 0     | 0     | 0.8   | 1     | 2      | 2.5    |
| Juvenile neurons            | Score | 0                   | 5     | 5      | 5     | 5     | 5     | 5     | 0      | 0      |
|                             |       | 1                   | 0     | 0      | 0     | 0     | 0     | 0     | 3      | 1      |
|                             |       | 2                   | 0     | 0      | 0     | 0     | 0     | 0     | 1      | 0      |
|                             |       | 3                   | 0     | 0      | 0     | 0     | 0     | 0     | 1      | 1      |
|                             |       | Arithmetic mean     | 0     | 0      | 0     | 0     | 0     | 0     | 1.6    | 2      |
| Sustentacular cells         | Score | 0                   | 5     | 5      | 5     | 5     | 5     | 5     | 5      | 2      |
|                             |       | 1                   | 0     | 0      | 0     | 0     | 0     | 0     | 0      | 0      |
|                             |       | 2                   | 0     | 0      | 0     | 0     | 0     | 0     | 0      | 0      |
|                             |       | 3                   | 0     | 0      | 0     | 0     | 0     | 0     | 0      | 0      |
|                             |       | Arithmetic mean     | 0     | 0      | 0     | 0     | 0     | 0     | 0      | 0      |
| Globose basal cells         | Score | 0                   | 5     | 5      | 5     | 5     | 5     | 5     | 5      | 2      |
|                             |       | 1                   | 0     | 0      | 0     | 0     | 0     | 0     | 0      | 0      |
|                             |       | 2                   | 0     | 0      | 0     | 0     | 0     | 0     | 0      | 0      |
|                             |       | 3                   | 0     | 0      | 0     | 0     | 0     | 0     | 0      | 0      |
|                             |       | Arithmetic mean     | 0     | 0      | 0     | 0     | 0     | 0     | 0      | 0      |
| Horizontal basal cells      | Score | 0                   | 5     | 5      | 5     | 5     | 5     | 5     | 5      | 2      |
|                             |       | 1                   | 0     | 0      | 0     | 0     | 0     | 0     | 0      | 0      |
|                             |       | 2                   | 0     | 0      | 0     | 0     | 0     | 0     | 0      | 0      |
|                             |       | 3                   | 0     | 0      | 0     | 0     | 0     | 0     | 0      | 0      |
|                             |       | Arithmetic mean     | 0     | 0      | 0     | 0     | 0     | 0     | 0      | 0      |
| Nerve fibers                | Score | 0                   | 5     | 5      | 5     | 5     | 5     | 5     | 3      | 0      |
|                             |       | 1                   | 0     | 0      | 0     | 0     | 0     | 0     | 1      | 1      |
|                             |       | 2                   | 0     | 0      | 0     | 0     | 0     | 0     | 1      | 1      |
|                             |       | 3                   | 0     | 0      | 0     | 0     | 0     | 0     | 0      | 0      |
|                             |       | Arithmetic mean     | 0     | 0      | 0     | 0     | 0     | 0     | 0.6    | 1.5    |
| Olfactory ensheathing cells | Score | 0                   | 5     | 5      | 5     | 5     | 5     | 5     | 3      | 0      |
|                             |       | 1                   | 0     | 0      | 0     | 0     | 0     | 0     | 0      | 1      |
|                             |       | 2                   | 0     | 0      | 0     | 0     | 0     | 0     | 1      | 1      |
|                             |       | 3                   | 0     | 0      | 0     | 0     | 0     | 0     | 1      | 0      |
|                             |       | Arithmetic mean     | 0     | 0      | 0     | 0     | 0     | 0     | 1      | 1.5    |
