# Supplementary figures and images for: Intranasal Borna Disease Virus (BoDV-1) Infection: Insights into Initial Steps and Potential Contagiosity
Source: MDPI journal article supplement (doi:10.3390/ijms20061318), 2019-03-15

**A**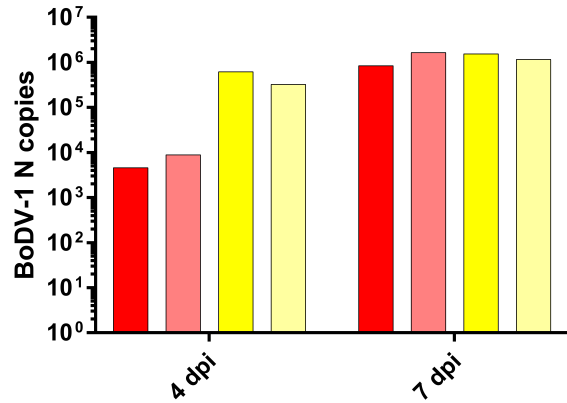

OM gRNA  
OM mRNA  
OEC gRNA  
OEC mRNA

**B**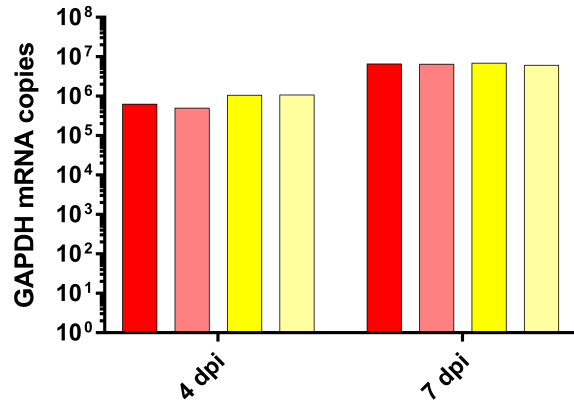

OM gRNA  
OM mRNA  
OEC gRNA  
OEC mRNA

Supplement: s1 [file s1]

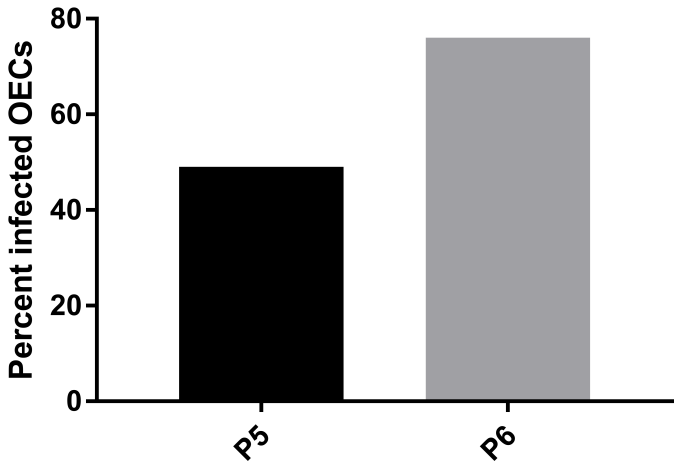

Supplement: s1 [file s1]
